# Supplementary material for: Bisferrocenyl-functionalized pseudopeptides: access to separated ionic and electronic contributions for electrochemical anion sensing
Source: Royal Society of Chemistry journal article supplement (doi:10.1039/c6ra04482d), 2016-01-01

## Bisferrocenyl-Functionalized Pseudopeptides: Access to Separated Ionic and Electronic Contributions for Electrochemical Anion Sensing

Mritunjay D. Pandey, Vicente Martí-Centelles, M. Isabel Burguete, Noemí Montoya, Santiago V. Luis, Enrique García-España, Antonio Doménech-Carbó

### Supplementary information

**Figure S1.** SEM images for a microparticulate deposits of a,b) **4** and c,d) **6** on a graphite bar a,c) before and b,d) after 10 min of electrolysis at +0.50 V in contact with 0.10 M NaClO<sub>4</sub>.

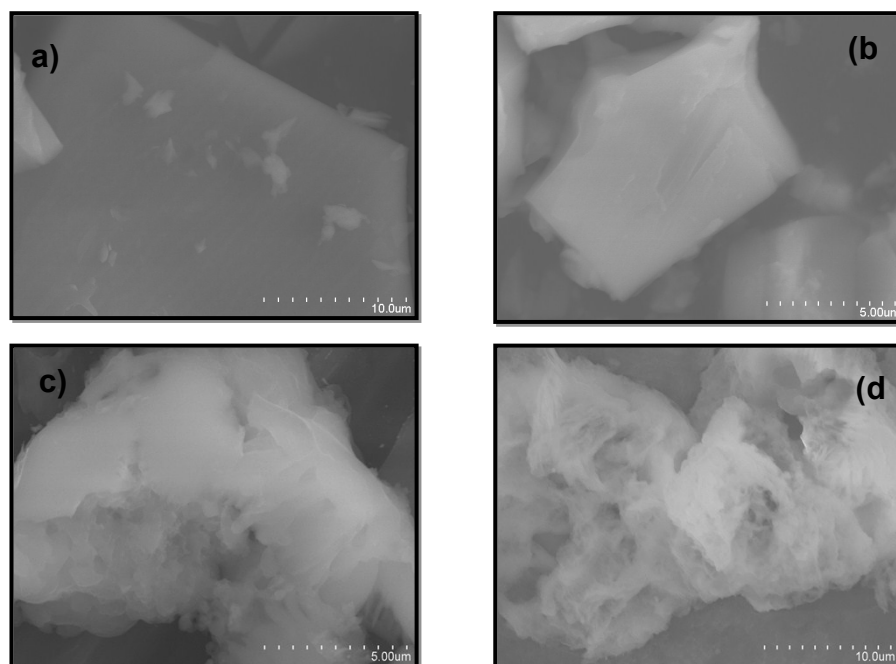

**Figure S2.** Initial portion of the OCP vs. time curves for microparticulate films of a,b) **5** and c,d) **6** in contact with a,c) 0.10 M NaClO<sub>4</sub> and b,d) 0.10 M NaNO<sub>3</sub>. (i) Freshly prepared electrode; (ii) electrode conditioned by previous cycling the potential (four cycles) between +0.05 and +0.65 V at 50 mV s<sup>-1</sup>.

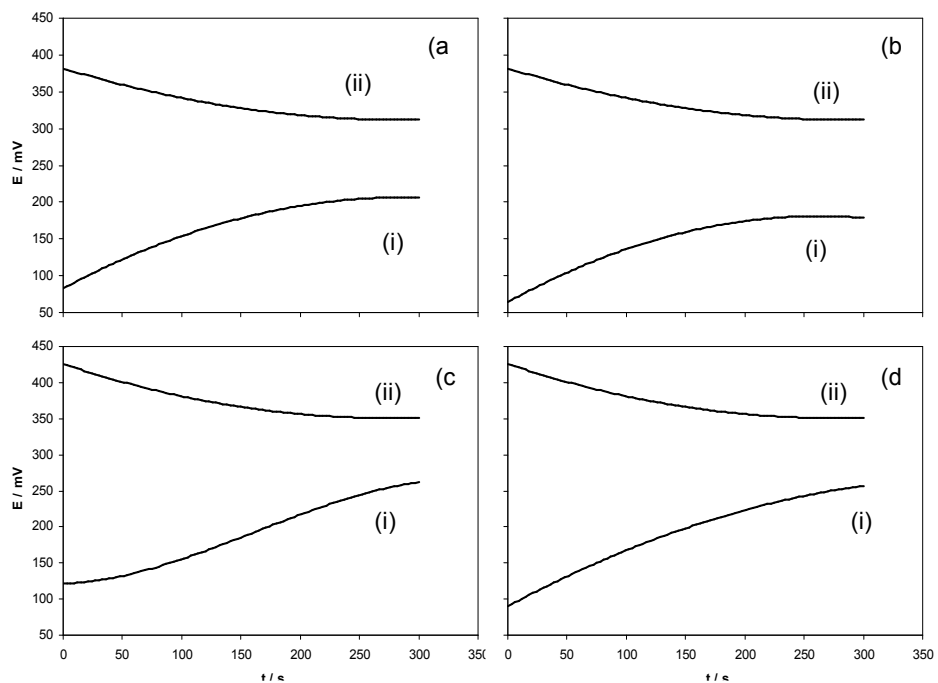

**Figure S3.** a,b) Cyclic and c,d) square wave voltammograms of microparticulate films of: a,c) **6** and b,d) **4** on glassy carbon electrode immersed into 0.10 M NaCl. Cyclic voltammograms: potential scan rate  $50 \text{ mV s}^{-1}$ . Square wave voltammograms: potential scan initiated at +0.05 V in the positive direction; potential step increment 4 mV; square wave amplitude 25 mV; frequency 5 Hz.

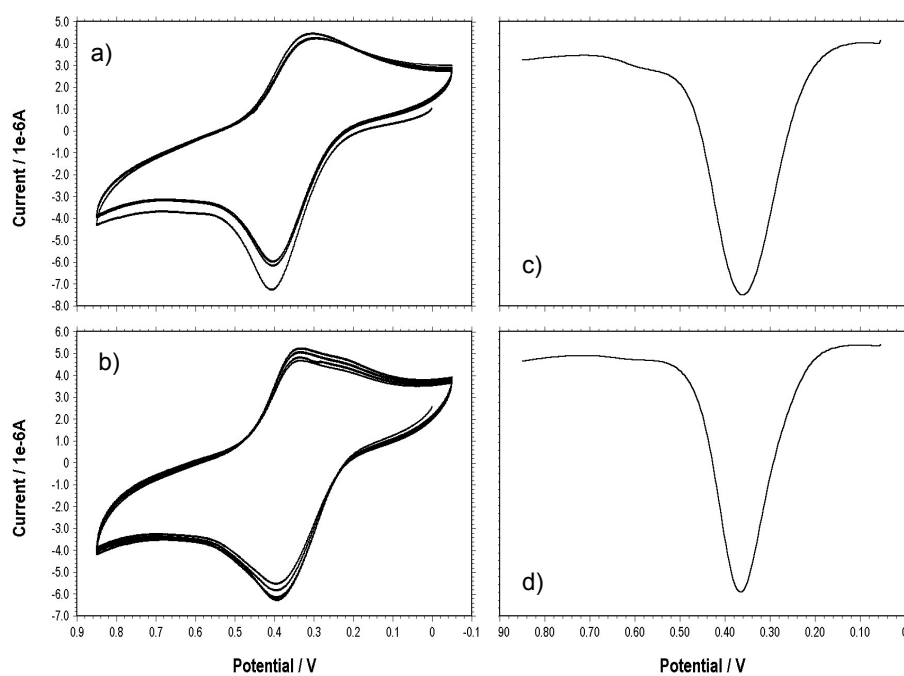

**Figure S4.** Variation of the charge passed under the voltammetric peaks on the surface density of pseudopeptide receptor in cyclic voltammograms of deposits of L2 in contact with 0.10 M NaClO<sub>4</sub>. Potential scan rate 50 mV s<sup>-1</sup>.

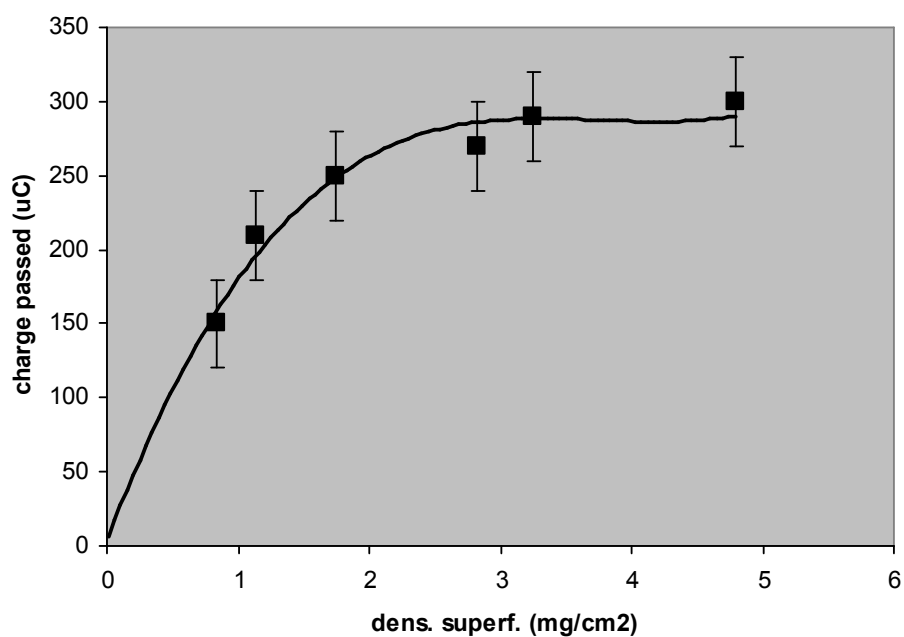

Supplement: c6ra04482d1.pdf [file c6ra04482d1.pdf]
